# Supplementary material for: Sustainable synthetic approach to π-conjugated arylacetylenic semiconductors for bulk heterojunction solar cells
Source: Royal Society of Chemistry journal article supplement (doi:10.1039/c3ra41048j), 2013-01-01
Supplement: c3ra41048j.pdf [file c3ra41048j.pdf]

## Supporting information for

# Sustainable synthetic approach to $\pi$ - conjugated arylacetylenic semiconductors for bulk heterojunction solar cells

*Elena Bartollini,<sup>a</sup> Mirko Seri,<sup>b</sup> Sara Tortorella,<sup>a</sup> Antonio Facchetti<sup>\*,c,d</sup>, Tobin J. Marks,<sup>\*,c</sup> Assunta Marrocchi,<sup>\*,a</sup> and Luigi Vaccaro<sup>\*,a</sup>*

<sup>a</sup>Dipartimento di Chimica, Università degli Studi di Perugia, via Elce di Sotto 8, 06123 Perugia (Italy); <sup>b</sup>Consiglio Nazionale delle Ricerche (CNR) - Istituto per la Sintesi Organica e la Fotoreattività (ISOF), via P. Gobetti 101, 40129 Bologna (Italy); <sup>c</sup>Department of Chemistry, the Materials Research Center, and the Argonne-Northwestern Solar Energy Research Center, Northwestern University, 2145 Sheridan Road, Evanston, IL, 62208 (USA); <sup>d</sup>Polyera Corporation, 8045 Lamon Avenue, Skokie, IL 60077 (USA)

e-mail: a-facchetti@northwestern.edu; t-marks@northwestern.edu; assunta@unipg.it;  
luigi@unipg.it

## Materials Synthesis.

**Scheme S1.** Synthetic routes to semiconductors **2-4**

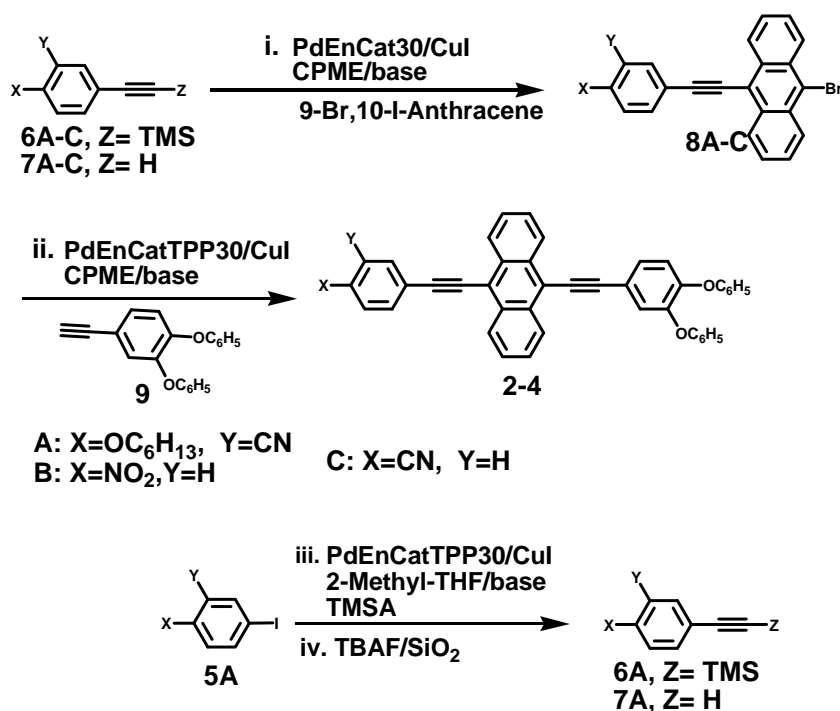

**2-(Hexyloxy)-5-[(trimethylsilyl)ethynyl]benzonitrile 6A.** 2-(Hexyloxy)-5-iodobenzonitrile<sup>S1</sup> **5A** (0.5 mmol), diisopropylamine (106  $\mu$ l, 0.75 mmol), trimethylsilylacetylene (106.3  $\mu$ L, 0.75 mmol), PdEnCatTPP30 (0.025 g, 0.01 mmol), CuI (0.0019 g, 0.01 mmol), and degassed 2-Methyl-THF (0.5 ml) were placed in a screw-capped vial equipped with a magnetic stirrer. Next, the mixture was stirred at 30°C for 18 h, then CH<sub>2</sub>Cl<sub>2</sub> was added (1 ml), and the catalyst recovered by filtration. The mixture was subsequently diluted with CH<sub>2</sub>Cl<sub>2</sub> (2 ml), washed with water (3ml x 2), dried over Na<sub>2</sub>SO<sub>4</sub>, filtered and evaporated to dryness to afford pure **6** (98% yield, yellow oil). <sup>1</sup>H-NMR (400 MHz, CDCl<sub>3</sub>)  $\delta$ : 0.23 (s, 9H), 0.91 (t, J=12.0 Hz, 3H), 1.33 (m, 4H), 1.48 (m, 2H), 1.84 (m, 2H), 4.06 (t, J= 6.5, 2H), 6.88 (dd, J=8.8 Hz, 2.1, 1H), 7.57 (dd, J=8.8, 2.13, 1H), 7.64 (d, J=2.0 Hz). <sup>13</sup>C-NMR (CDCl<sub>3</sub>,  $\delta$ ): 161.7, 137.9, 136.6, 118.7, 118.6, 113.1, 104.1, 100.9, 95.0, 71.2, 31.5, 29.5, 25.6, 22.6, 13.9, -0.3.

**E-factor**= [0.164 g (2-(hexyloxy)-5-iodobenzonitrile) + 0.076 g (diisopropylamine) + 0.408 g (2-methyl-THF) + 0.1474 g (trimethylsilylacetylene) + 0.0019 g (CuI) + 0.025 (PdEnCatTPP30) + 3.97 g (CH<sub>2</sub>Cl<sub>2</sub>) + 6.0 g (H<sub>2</sub>O) – 0.146 g (product x yield)]/ 0.146 g= **72.91**

Not accounting for drying agent.

**5-Ethynyl-2-(hexyloxy)benzonitrile 7A.** In a screw capped vial equipped with a magnetic stirrer 2-(hexyloxy)-5-[(trimethylsilyl)ethynyl]benzonitrile **6A** (0.5 mmol) and SiO<sub>2</sub>-supported TBAF (0.0625 g, 0.05 mmol; 1.25 mmol/g) were added, and the resulting mixture was left under vigorous stirring at 30°C. After 3 hours, ethyl acetate (1 ml) was added. The catalyst was then filtered off and washed with ethyl acetate (1.5 ml). The solvent was removed under vacuum to give compound **7A** as a yellow oil Yield: 95%. <sup>1</sup>H-NMR

(400 MHz, CDCl<sub>3</sub>) δ: 7.05 (d, J=8.2 Hz, 1H), 6.99 (m, 1H), 6.08 (d, J=8.2 Hz, 1H), 3.97 (m, 2H), 2.98 (s, 1H), 1.81 (m, 4H), 4.52 (m, 2H), 1.34 (m, 2H), 0.92 (m, 3H). <sup>13</sup>C-NMR (CDCl<sub>3</sub>, δ): 161.7, 138.9, 137.6, 118.6, 113.4, 113.8, 101.3, 82.5, 78.9, 71.2, 31.5, 29.5, 25.6, 22.6, 13.9.

**E-factor** = [0.149 g (2-(hexyloxy)-5-[(trimethylsilyl)ethynyl]benzonitrile) + 0.0625 g (TBAF/SiO<sub>2</sub>) + 2.25 g (ethyl acetate) – 0.108 g (product x yield)]/0.108 g = **21.7**

**5-[(10-Bromo-9-anthryl)ethynyl]-2-(hexyloxy)benzonitrile 8A.** In a screw capped vial equipped with a magnetic stirrer 5-ethynyl-2-(hexyloxy)benzonitrile **7A** (0.43 mmol), degassed cyclopentyl methyl ether (CPME, 0.66 ml), 9-iodo,10-bromo-anthracene (0.149 g, 0.39 mmol), diisopropylamine (1.063 g, 10.53 mmol), CuI (0.00074g, 0.0039 mmol), and PdEnCat30 (0.029g, 0.011 mmol) were consecutively added and the resulting mixture was left under vigorous stirring at 55°C. After 18 hours, the crude mixture was diluted with CHCl<sub>3</sub> (2 ml), the catalyst was filtered off, and the solvent removed under vacuum to give 9-bromo-10-[4-hexyloxy-(3-nitrophenyl)ethynyl]anthracene **8**. The crude product was purified by flash silica gel chromatography (eluent: petroleum ether/dichloromethane 9/1). Yield: 88% (yellow crystals); <sup>1</sup>H NMR (CDCl<sub>3</sub>, δ): 8.60 (m, 1H), 7.95 (m, 4H), 7.92 (d, J=8.5 Hz, 1H), 7.64 (m, 4H), 7.02 (d, J=8.5 Hz, 1H), 4.15 (m, 2H), 1.90 (m, 4H), 1.27 (m, 4H), 0.94 (m, 3H); <sup>13</sup>C-NMR (CDCl<sub>3</sub>, δ): 161.5, 143.2, 141.9, 134.3, 134.2, 130.9, 130.1, 126.3, 126.2, 123.9, 118.4, 113.5, 101.4, 95.6, 93.0, 71.2, 31.5, 29.5, 25.6, 22.5, 13.9. An. Calcd. For: C<sub>29</sub>H<sub>24</sub>BrNO: C, 72.20; H, 5.01; N, 2.90%. Found: C, 72.29; H, 5.00; N, 2.88%.

**E-factor** = [0.097 g (5-ethynyl-2-(hexyloxy)benzonitrile) + 0.149 g (9-bromo,10-iodoanthracene) + 0.57 g (cyclopentyl methyl ether) + 0.00074g (CuI) + 1.063 g (diisopropylamine) + 0.029 g (PdEnCat30) + 2.98 g (CHCl<sub>3</sub>) + 20 g (SiO<sub>2</sub>) + 104.33 g (petroleum ether) + 11.40 g (CH<sub>2</sub>Cl<sub>2</sub>) – 0.165 g (product x yield)]/0.165 g = **851.2**

**9-Bromo-10-(4-nitrophenylethynyl) anthracene 8B.** Prepared by coupling 9-bromo-10-iodoanthracene with 4-nitro-ethynylbenzene **7B** (1:1.1), following the above procedure. The crude product was purified by recrystallization from toluene (2x25ml) to give the pure compound as yellow needles. Yield: 94%; <sup>1</sup>H NMR (CDCl<sub>3</sub>, δ): 8.56 (m, 4H), 8.26 (d, J= 11.2 Hz, 2H), 7.84 (d, J= 11.2 Hz, 2H), 7.6 (m, 4H).<sup>S3</sup>

**E-factor:** *vide infra*

**4-[(10-Bromo-9-anthryl)ethynyl]benzonitrile 8C.** Prepared by coupling 9-bromo-10-iodoanthracene with 4-ethynyl-benzonitrile **7C** (1:1.1), following the procedure described for bromoderivative **8A**. The crude product was purified by crystallization from toluene (30 ml) to give the pure compound as yellow crystals. Yield: 89%; <sup>1</sup>H NMR (CDCl<sub>3</sub>, δ): 8.53 (m, 4H), 7.76 (m, 2H), 7.67 (m, 2H), 7.58 (m, 4H).<sup>S4</sup>

**E-factor:** *vide infra*

**5-[(10-[[3,4-Bis(hexyloxy)phenyl]ethynyl]-9-anthryl)ethynyl]-2-(hexyloxy)benzonitrile (2).** In a screw capped vial equipped with a magnetic stirrer 3,4-bis(hexyloxy)ethynylbenzene **9** (0.130 g, 0.43 mmol),

degassed cyclopentyl methyl ether (CPME, 0.66 ml), bromoderivative **8A** (0.39 mmol), diisopropylamine (2.126 g, 21.06 mmol), CuI (0.0029 g, 0.015 mmol), and PdEnCatTPP30 (0.082 g, 0.033 mmol) were consecutively added and the resulting mixture was left under vigorous stirring at 50°C. After 20 hours, the crude mixture was diluted with CHCl<sub>3</sub> (2 ml), the catalyst was filtered off, and the solvent removed under vacuum to give 9-bromo-10-[4-hexyloxy-(3-nitrophenyl)ethynyl]anthracene **8**. This latter was purified by recrystallization from ethyl acetate (2x25ml) to give the pure compound as orange needles. Yield: 67%. <sup>1</sup>H-NMR (CDCl<sub>3</sub>, δ): 8.69 (m, 3H), 8.61 (m, 3H), 7.96 (s, 1H), 7.57 (m, 1H), 7.52 (m, 3H), 7.26 (m, 1H), 7.02 (m, 1H), 6.94 (m, 1H), 4.10 (m, 4H), 1.88 (m, 6H), 1.51 (m, 6H), 0.92 (m, 6H); <sup>13</sup>C-NMR (CDCl<sub>3</sub>, δ): 14.0, 22.5, 22.6, 25.5, 25.7, 28.8, 29.2, 29.3, 31.4, 31.6, 69.2, 69.52, 76.7, 76.9, 77.3, 86.9, 99.6, 112.5, 113.4, 115.4, 116.7, 125.3, 126.6, 126.9, 127.4, 131.9, 132.1, 136.7, 160.6. An. Calcd. For: C<sub>49</sub>H<sub>53</sub>NO<sub>3</sub>: C, 83.60; H, 7.59; N, 1.99. Found: C, 83.72; H, 7.60; N, 1.97%.

**E-factor** = [0.130 g (3,4-bis(hexyloxy)ethynylbenzene) + 0.188 g (**8A**) + 0.57 g (cyclopentyl methyl ether) + 0.0029 g (CuI) + 2.126 g (diisopropylamine) + 0.082 g (PdEnCatTPP30) + 2.98 g (CHCl<sub>3</sub>) + 45.10 g (ethyl acetate) – 0.186 g (product x yield)]/0.186 g = **274.1**

**9-[[3,4-Bis(hexyloxy)phenyl]ethynyl]-10-[[4-nitrophenyl]ethynyl]anthracene (3)**. Prepared by coupling compound **8B** and 1,2-bis(hexyloxy)-4-ethynylbenzene (**9**) (1/1.1) following the procedure described for reaction between **8** and **9**. Yield: 69% (red crystals).<sup>S3</sup> <sup>1</sup>H-NMR (CDCl<sub>3</sub>, δ): 8.65 (m, 2H), 8.55 (m, 2H), 8.24 (d, J = 8.8 Hz, 2H), 7.80 (d, J = 8.7 Hz, 2H), 7.61 (m, 4H), 7.30 (d, 1H), 6.88 (d, 1H), 4.01 (m, 4H), 1.82 (m, 4H), 1.62–1.20 (m, 10H), 0.87 (s, 6H).

**E-factor**: *vide infra*

**4-[(10-[[3,4-Bis(hexyloxy)phenyl]ethynyl]-9-anthryl)ethynyl]benzonitrile (4)**. Prepared by coupling compound **8C** and 1,2-bis(hexyloxy)-4-ethynylbenzene (**9**) (1/1.1) following the above procedure. Yield: 70% (red-orange crystals); m.p. 158°-159°C; <sup>1</sup>H-NMR (CDCl<sub>3</sub>, δ): 8.65 (m, 2H), 8.56 (m, 2H), 7.81 (d, J=8.6 Hz, 2H), 7.69 (d, J=8.6 Hz, 2H), 7.61 (m, 4H), 7.29 (m, 1H), 7.20 (m, 1H), 6.88 (m, 1H), 4.32 (m, 4H), 1.82 (m, 6H), 1.47 (m, 6H), 1.21 (m, 4H), 0.83 (m, 6H). <sup>13</sup>C-NMR (CDCl<sub>3</sub>, δ): 150.4, 148.9, 132.3, 132.2, 132.0, 131.8, 128.3, 127.5, 127.2, 126.8, 126.7, 125.4, 120.3, 118.5, 116.7, 116.4, 115.2, 113.3, 111.6, 103.7, 100.2, 91.0, 84.8, 69.5, 69.2, 31.6, 29.2, 29.1, 25.7, 22.6, 14.0. An. Calcd. For: C<sub>43</sub> H<sub>41</sub> NO<sub>2</sub>: C, 85.54; H, 6.84; N, 2.32. Found: C, 85.48; H, 6.85; N, 2.30%.

**E-factor** = [0.130 g (3,4-bis(hexyloxy)ethynylbenzene) + 0.191 g (**8C**) + 0.57 g (cyclopentyl methyl ether) + 0.0029 g (CuI) + 2.126 g (diisopropylamine) + 0.082 g (PdEnCatTPP30) + 2.98 g (CHCl<sub>3</sub>) + 45.10 g (ethyl acetate) – 0.211 g (product x yield)]/0.211 g = **241.56**

**E-factor calculation for the preparation of [3,4-bis(hexyloxy)phenyl]ethynyltrimethylsilane 11 by the Sonogashira reaction of 0.5 mmol of 1,2-bis(hexyloxy)4-iodobenzene 10 with trimethylsilylacetylene.**

- L. Valentini, D. Bagnis, A. Marrocchi, M. Seri, A. Taticchi, and J. M. Kenny *Chem. Mater.* 2008, **20**, 32 (SI):

**E-factor**= [0.202 g (1,2-Bis(hexyloxy)-4-iodobenzene) + 0.729 g (diisopropylamine) + 2.041 g (toluene) + 0.197 g (trimethylsilylacetylene) + 0.0077 g (CuI) + 0.0473 (PdCl<sub>2</sub>(PPh<sub>3</sub>)<sub>2</sub>) + 30 g (SiO<sub>2</sub>) + 49.7 g (CH<sub>2</sub>Cl<sub>2</sub>) + 140.05 g (C<sub>6</sub>H<sub>14</sub>) – 0.185 g (product x yield)]/0.185 g = **1204.3**

- **Optimized conditions:**

**E-factor**= [0.202 g (1,2-Bis(hexyloxy)-4-iodobenzene) + 0.075 g (diisopropylamine) + 0.204 g (2-methyl-THF) + 0.073 g (trimethylsilylacetylene) + 0.0019 g (CuI) + 0.025 (PdEnCatTPP30) + 3.97 g (CH<sub>2</sub>Cl<sub>2</sub>) + 6.0 g (H<sub>2</sub>O) – 0.185 g (product x yield)]/0.185 g = **56.03**

Not accounting for drying agent.

Waste reduction: **95.3%**

**E-factor calculation for the preparation of 3,4-Bis(hexyloxy)ethynylbenzene 9 by the de-silylation reaction of 0.5 mmol of bis(hexyloxy)phenyl]ethynyltrimethylsilane 11.**

- L. Valentini, D. Bagnis, A. Marrocchi, M. Seri, A. Taticchi, and J. M. Kenny *Chem. Mater.* 2008, **20**, 32 (SI).

**E-factor**= [0.188 g ([bis(hexyloxy)phenyl]ethynyltrimethylsilane) + 0.189 g (TBAF in THF) + 3.32 g (THF) + 20 g (SiO<sub>2</sub>) + 166 g (petroleum ether) + 60 g (CH<sub>2</sub>Cl<sub>2</sub>) – 0.138 g (product x yield)]/0.138 g=  
**1808.4**

- **Optimized conditions:**

**E-factor** = [0.188 g ([bis(hexyloxy)phenyl]ethynyltrimethylsilane) + 0.0625 g (TBAF/SiO<sub>2</sub>) + 2.25 g (ethyl acetate) – 0.146 g (product x yield)]/0.146 g= **16.1**

Waste reduction: **99.1%**

**E-factor calculation for the preparation of 9-bromo-10-(4-nitrophenylethynyl) anthracene 8B by the Sonogashira reaction of 0.39 mmol of 9-bromo-10-iodoanthracene with 4-nitro-ethynylbenzene 7B.**

- A. Marrocchi, A. Spalletti, R. Flamini, I., S. Ciorba, M. Seri, F. Elisei, and A. Taticchi, *J. Photochem. Photobiol. A* 2010, **211**, 162 (S2).

**E-factor** = [0.063 g (4-nitro-ethynylbenzene) + 0.149 g (9-bromo,10-iodoanthracene) + 1.80 g (toluene) + 0.0053 g (CuI) + 2.126 g (diisopropylamine) + 0.032 g (Pd(PPh<sub>3</sub>)<sub>4</sub>) + 40 g (SiO<sub>2</sub>) + 265 g (CH<sub>2</sub>Cl<sub>2</sub>) + 520 g (petroleum ether) – 0.141 g (product x yield)]/0.141 g = **5879.6**

- **Optimized conditions:**

**E-factor** = [0.063 g (4-nitro-ethynylbenzene) + 0.149 g (9-bromo,10-iodoanthracene) + 0.57 g (cyclopentyl methyl ether) + 0.00074g (CuI) + 1.063 g (diisopropylamine) + 0.029 g (PdEnCat30) + 2.98 g (CHCl<sub>3</sub>) + 43.25 g (toluene) – 0.147 g (product x yield)]/0.147 g = **326.2**

Waste reduction: **94.4%**

**E-factor calculation for the preparation of 4-[(10-bromo-9-anthryl)ethynyl]benzonitrile 8C by the Sonogashira reaction of 0.39 mmol of 9-bromo-10-iodoanthracene with 4-ethynyl-benzonitrile 7C.**

- R. Flamini, I. Tomasi, A. Marrocchi, B. Carlotti, A. Spalletti, *J. Photochem. Photobiol. A* 2011, **223**, 140 (S3)

**E-factor** = [0.052 g (4-ethynyl-benzonitrile) + 0.149 g (9-bromo,10-iodoanthracene) + 2.02 g (toluene) + 0.011 g (CuI) + 2.126 g (diisopropylamine) + 0.064 g (Pd(PPh<sub>3</sub>)<sub>4</sub>) + 40 g (SiO<sub>2</sub>) + 331.25 g (CH<sub>2</sub>Cl<sub>2</sub>) + 487.5 g (petroleum ether) – 0.131 g (product x yield)]/0.131 g = **6588.1**

- **Optimized conditions:**

**E-factor** = [0.052 g (4-ethynyl-benzonitrile) + 0.149 g (9-bromo,10-iodoanthracene) + 0.57 g (cyclopentyl methyl ether) + 0.00074g (CuI) + 1.063 g (diisopropylamine) + 0.029 g (PdEnCat30) + 2.98 g (CHCl<sub>3</sub>) + 25.95 g (toluene) – 0.137 g (product x yield)]/0.137 g = **223.7**

Waste reduction: **96.6%**



**E-factor calculation for the preparation of 9-[[3,4-bis(hexyloxy)phenyl]ethynyl]-10-[[4-nitrophenyl]ethynyl]anthracene (3) by the Sonogashira reaction of 0.39 mmol of 9-bromo-10-(4-nitrophenylethynyl) anthracene 8B with 3,4-bis(hexyloxy)ethynylbenzene 9.**

- Marrocchi, A. Spalletti, R. Flamini, I., S. Ciorba, M. Seri, F. Elisei, and A. Taticchi, *J. Photochem. Photobiol. A* 2010, **211**, 162.(S2)

**E-factor** = [0.130 g (3,4-bis(hexyloxy)ethynylbenzene) + 0.156 g (**8B**) + 2.02 g (toluene) + 0.011 g (CuI) + 2.126 g (diisopropylamine) + 0.064 g (Pd(PPh<sub>3</sub>)<sub>4</sub>) + 40 g (SiO<sub>2</sub>) + 331.25 g (CH<sub>2</sub>Cl<sub>2</sub>) + 487.5 g (petroleum ether) – 0.148 g (product x yield)]/0.148 g = **5831.8**

- **Optimized conditions:**

**E-factor= 305.3**

[0.130 g (3,4-bis(hexyloxy)ethynylbenzene) + 0.156 g (**8B**) + 0.57 g (cyclopentyl methyl ether) + 0.0029 g (CuI) + 2.126 g (diisopropylamine) + 0.082 g (PdEnCatTPP30) + 2.98 g (CHCl<sub>3</sub>) + 45.10 g (ethyl acetate) – 0.167 g (product x yield)]/0.167 g

Waste reduction: **94.8%**

**Table S1.** Optimization of the Sonogashira reaction of [4-(Hexyloxy)-3-nitro]iodobenzene **5** with trimethylsilylacetylene (TMSA)

| Entry | Medium <sup>a</sup>       | iPr <sub>2</sub> NH (eq) | Catalyst (mol%)                                                       | CuI (mol%) | TMSA (eq) | Conversion (%) <sup>b</sup> |
|-------|---------------------------|--------------------------|-----------------------------------------------------------------------|------------|-----------|-----------------------------|
| 1     | Toluene                   | 14                       | PdEncatTPP30 (8)                                                      | 8          | 4         | 32                          |
| 2     | THF                       | 14                       | PdEncatTPP30 (8)                                                      | 8          | 4         | 88                          |
| 3     | Cyclopentylmethyl ether   | 14                       | PdEncatTPP30 (8)                                                      | 8          | 4         | 55                          |
| 4     | Ethanol 96%               | 14                       | PdEncatTPP30 (8)                                                      | 8          | 4         | 13                          |
| 5     | 2-methyl-THF              | 14                       | PdEncatTPP30 (8)                                                      | 8          | 4         | 100                         |
| 6     | 2-methyl-THF              | 14                       | PdEncatTPP30 (8)                                                      | 8          | 2         | 100                         |
| 7     | 2-methyl-THF              | 4                        | PdEncatTPP30 (8)                                                      | 8          | 2         | 100                         |
| 8     | 2-methyl-THF              | 1.5                      | PdEncatTPP30 (8)                                                      | 8          | 1.5       | 100                         |
| 9     | 2-methyl-THF <sup>c</sup> | 1.5                      | PdEncatTPP30 (2)                                                      | 2          | 1.5       | 92                          |
| 10    | 2-methyl-THF <sup>d</sup> | 1.5                      | PdEncatTPP30 (2)                                                      | 2          | 1.5       | 92                          |
| 11    | 2-methyl-THF <sup>e</sup> | 1.5                      | PdEncatTPP30 (2)                                                      | 2          | 1.5       | 100                         |
| 12    | 2-methyl-THF              | 1.5                      | PdEncatTPP30 (2)                                                      | 2          | 1.5       | 78 <sup>f</sup>             |
| 13    | 2-methyl-THF              | 1.5                      | PdEncatTPP30 (1)                                                      | 1          | 1.5       | 39                          |
| 14    | 2-methyl-THF              | 1.2                      | PdEncatTPP30 (2)                                                      | 2          | 1.2       | 47                          |
| 15    | 2-methyl-THF              | 1.05                     | PdEncatTPP30 (5)                                                      | 5          | 1.05      | 72                          |
| 16    | 2-methyl-THF              | 1.05                     | PdEncatTPP30 (2)                                                      | 2          | 1.05      | 46                          |
| 17    | 2-methyl-THF              | 1.05                     | Pd/C (2)                                                              | 2          | 1.05      | 5                           |
| 18    | 2-methyl-THF              | 1.05                     | Pd/Al <sub>2</sub> O <sub>3</sub> (2)                                 | 2          | 1.05      | --                          |
| 19    | 2-methyl-THF              | 1.05                     | PdEnCat30 (2)                                                         | 2          | 1.05      | --                          |
| 20    | 2-methyl-THF              | 1.05                     | PdCl <sub>2</sub> (PPh <sub>3</sub> ) <sub>2</sub> -polymer bound (2) | 2          | 1.05      | --                          |

<sup>a</sup>0.125 M; <sup>b</sup>Reaction time: 18h, Reaction temperature: 30°C; <sup>c</sup>Complete conversion after 24 h, 99% yield; <sup>d</sup> 0.4 M; <sup>e</sup> 1M; <sup>f</sup> 2.5M

**Table S2.** Optimization of the de-silylation reaction of {[4-hexyloxy-, 3-nitrophenyl]ethynyl}(trimethyl)silane **6**.

| Entry <sup>a</sup> | Catalyst (mol%)                         | Reaction time | Conversion (%) |
|--------------------|-----------------------------------------|---------------|----------------|
| 1                  | TBAF <sup>b</sup> (100)                 | 20 h          | 90             |
| 2                  | TBAF · H <sub>2</sub> O (20)            | 10'           | 100            |
| 3                  | TBAF · H <sub>2</sub> O (10)            | 15'           | 100            |
| 4                  | TBAF · H <sub>2</sub> O (5)             | 15'           | 5              |
| 5                  | TBAF · H <sub>2</sub> O (5)             | 2 h           | 5              |
| 7                  | Amb-F (20)                              | 15'           | 3              |
| 8                  | Amb-F (20)                              | 3 h           | 12             |
| 9                  | Amb-F (20)                              | 20 h          | 36             |
| 10                 | Amb-F (20)                              | 48 h          | 60             |
| 11                 | TBAF/SiO <sub>2</sub> (20)              | 15'           | 100            |
| 12                 | TBAF/SiO <sub>2</sub> (10) <sup>c</sup> | 15'           | 55             |
| 13                 | TBAF/SiO <sub>2</sub> (10) <sup>c</sup> | 2 h           | 83             |
| 14                 | TBAF/SiO <sub>2</sub> (10) <sup>c</sup> | 3 h           | 100            |
| 15                 | TBAF/SiO <sub>2</sub> (10) <sup>d</sup> | 20 h          | --             |
| 16                 | KF/Al <sub>2</sub> O <sub>3</sub> (10)  | 20 h          | --             |
| 17                 | DABCO-F2 (10) <sup>e</sup>              | 20 h          | 21             |

<sup>a</sup>SolFC; <sup>b</sup>1M in THF; <sup>c</sup>loading: 1.25 mmol/g; <sup>d</sup>loading: 0.29 mmol/g; <sup>e</sup>loading: 4.8 mmol/g

**Table S3.** Optimization of the Sonogashira reaction of 4-ethynyl-1-(hexyloxy)-2-nitrobenzene **7** with 9-bromo,10-iodoanthracene.<sup>a</sup>

| Entry | Medium <sup>b</sup>                   | iPr <sub>2</sub> NH (eq) | Catalyst (mol%)                       | CuI (mol%) | Conversion (%) <sup>c</sup> |
|-------|---------------------------------------|--------------------------|---------------------------------------|------------|-----------------------------|
| 1     | Toluene                               | 45                       | PdEnCatTPP30 (4)                      | 4          | 23                          |
| 2     | THF                                   | 45                       | PdEnCatTPP30 (4)                      | 4          | 70                          |
| 3     | 2-methyl-THF                          | 45                       | PdEnCatTPP30 (4)                      | 4          | 75                          |
| 4     | Ethanol 96%                           | 45                       | PdEnCatTPP30 (4)                      | 4          | 23                          |
| 5     | Cyclopentyl methyl ether              | 45                       | PdEnCatTPP30 (4)                      | 4          | 100                         |
| 6     | Cyclopentyl methyl ether              | 36                       | PdEnCatTPP30 (4)                      | 4          | 88                          |
| 7     | Cyclopentyl methyl ether              | 27                       | PdEnCatTPP30 (4)                      | 4          | 87                          |
| 8     | Cyclopentyl methyl ether              | 18                       | PdEnCatTPP30 (4)                      | 4          | 82                          |
| 9     | Cyclopentyl methyl ether <sup>d</sup> | 27                       | PdEnCatTPP30 (4)                      | 4          | 60                          |
| 10    | Cyclopentyl methyl ether <sup>e</sup> | 27                       | PdEnCatTPP30 (4)                      | 4          | 53                          |
| 11    | Cyclopentyl methyl ether <sup>f</sup> | 27                       | PdEnCatTPP30 (4)                      | 4          | 45                          |
| 12    | Cyclopentyl methyl ether              | 27                       | PdEnCat40 (4)                         | 4          | --                          |
| 13    | Cyclopentyl methyl ether              | 27                       | PdEnCatPolyTPP (4)                    | 4          | 90                          |
| 14    | Cyclopentyl methyl ether              | 27                       | Pd/SiO <sub>2</sub> (4)               | 4          | 5                           |
| 15    | Cyclopentyl methyl ether              | 27                       | Pd/Al <sub>2</sub> O <sub>3</sub> (4) | 4          | 47                          |
| 16    | Cyclopentyl methyl ether              | 27                       | PdEnCat30 (4)                         | 4          | 100                         |
| 17    | Cyclopentyl methyl ether              | 27                       | PdEnCat30 (4)                         | 0.5        | 93                          |
| 18    | Cyclopentyl methyl ether              | 27                       | PdEnCat30 (4)                         | 1          | 100                         |
| 19    | Cyclopentyl methyl ether              | 27                       | PdEnCat30 (3)                         | 1          | 100                         |
| 20    | Cyclopentyl methyl ether              | 27                       | PdEnCat30 (2)                         | 1          | 81                          |

<sup>a</sup> 1.1:1 Molar ratio; <sup>b</sup> 0.06 M; <sup>c</sup> Reaction time: 18h. Reaction temperature: 55°C; <sup>d</sup> 0.13 M; <sup>e</sup> 0.2 M; <sup>f</sup> 0.5M.

**Table S4.** Optimization of the Sonogashira reaction of 3,4- bis(hexyloxy)- ethynylbenzene **9** with 9-bromo-10-[4-hexyloxy-(3-nitrophenyl)ethynyl]anthracene **8**.

| Entry | Medium <sup>b</sup>      | iPr <sub>2</sub> NH (eq) | Catalyst (mol%)                       | CuI (mol%) | Conversion (%) <sup>c</sup> |
|-------|--------------------------|--------------------------|---------------------------------------|------------|-----------------------------|
| 1     | Toluene                  | 45                       | PdEnCatTPP30 (4)                      | 4          | 28                          |
| 3     | 2-methyl-THF             | 45                       | PdEnCatTPP30 (4)                      | 4          | 21                          |
| 5     | Cyclopentyl methyl ether | 45                       | PdEnCatTPP30 (4)                      | 4          | 25                          |
| 6     | Cyclopentyl methyl ether | 45                       | PdEnCatTPP30 (6)                      | 4          | 78                          |
| 7     | Cyclopentyl methyl ether | 27                       | PdEnCatTPP30 (6)                      | 4          | 75                          |
| 8     | Cyclopentyl methyl ether | 27                       | PdEnCatTPP30 (6)                      | 1          | 70                          |
| 13    | Cyclopentyl methyl ether | 27                       | PdEnCatPolyTPP (4)                    | 4          | 90                          |
| 14    | Cyclopentyl methyl ether | 27                       | Pd/SiO <sub>2</sub> (4)               | 4          | --                          |
| 15    | Cyclopentyl methyl ether | 27                       | Pd/Al <sub>2</sub> O <sub>3</sub> (4) | 4          | 23                          |
| 16    | Cyclopentyl methyl ether | 27                       | PdEnCat30 (4)                         | 4          | --                          |

<sup>a</sup> 1.1:1 Molar ratio; <sup>b</sup> 0.06 M; <sup>c</sup> Reaction time: 20h. Reaction temperature: 50°C.

**Table S5.** Optimization of the Sonogashira reaction of 1,2-Bis(hexyloxy)-4-iodobenzene **10** with trimethylsilylacetylene (TMSA)

| Entry | Medium <sup>a</sup>       | iPr <sub>2</sub> NH (eq) | Catalyst (mol%)                                                       | CuI (mol%) | TMSA (eq) | Conversion (%) <sup>b</sup> |
|-------|---------------------------|--------------------------|-----------------------------------------------------------------------|------------|-----------|-----------------------------|
| 1     | Toluene                   | 14                       | PdEnCatTPP30 (8)                                                      | 8          | 4         | 25                          |
| 2     | THF                       | 14                       | PdEnCatTPP30 (8)                                                      | 8          | 4         | 85                          |
| 3     | Cyclopentylmethyl ether   | 14                       | PdEnCatTPP30 (8)                                                      | 8          | 4         | 50                          |
| 4     | Ethanol 96%               | 14                       | PdEnCatTPP30 (8)                                                      | 8          | 4         | 9                           |
| 5     | 2-methyl-THF              | 14                       | PdEnCatTPP30 (8)                                                      | 8          | 4         | 100                         |
| 6     | 2-methyl-THF              | 14                       | PdEnCatTPP30 (8)                                                      | 8          | 2         | 100                         |
| 7     | 2-methyl-THF              | 4                        | PdEnCatTPP30 (8)                                                      | 8          | 2         | 100                         |
| 8     | 2-methyl-THF              | 1.5                      | PdEnCatTPP30 (8)                                                      | 8          | 1.5       | 100                         |
| 9     | 2-methyl-THF <sup>c</sup> | 1.5                      | PdEnCatTPP30 (2)                                                      | 2          | 1.5       | 89                          |
| 10    | 2-methyl-THF <sup>d</sup> | 1.5                      | PdEnCatTPP30 (2)                                                      | 2          | 1.5       | 89                          |
| 11    | 2-methyl-THF <sup>e</sup> | 1.5                      | PdEnCatTPP30 (2)                                                      | 2          | 1.5       | 100                         |
| 12    | 2-methyl-THF              | 1.5                      | PdEnCatTPP30 (2)                                                      | 2          | 1.5       | 76 <sup>f</sup>             |
| 13    | 2-methyl-THF              | 1.5                      | PdEnCatTPP30 (1)                                                      | 1          | 1.5       | 41                          |
| 14    | 2-methyl-THF              | 1.2                      | PdEnCatTPP30 (2)                                                      | 2          | 1.2       | 47                          |
| 15    | 2-methyl-THF              | 1.05                     | PdEnCatTPP30 (5)                                                      | 5          | 1.05      | 69                          |
| 16    | 2-methyl-THF              | 1.05                     | PdEnCatTPP30 (2)                                                      | 2          | 1.05      | 42                          |
| 17    | 2-methyl-THF              | 1.05                     | Pd/C (2)                                                              | 2          | 1.05      | --                          |
| 18    | 2-methyl-THF              | 1.05                     | Pd/Al <sub>2</sub> O <sub>3</sub> (2)                                 | 2          | 1.05      | --                          |
| 19    | 2-methyl-THF              | 1.05                     | PdEnCat30 (2)                                                         | 2          | 1.05      | --                          |
| 20    | 2-methyl-THF              | 1.05                     | PdCl <sub>2</sub> (PPh <sub>3</sub> ) <sub>2</sub> -polymer bound (2) | 2          | 1.05      | --                          |

<sup>a</sup>0.125 M; <sup>b</sup>Reaction time: 18h, Reaction temperature: 30°C; <sup>c</sup>Complete conversion after 24 h, 99% yield; <sup>d</sup> 0.4 M; <sup>e</sup> 1M; <sup>f</sup> 2.5M

**Table S6.** Optimization of the de-silylation reaction of {[3,4-bis(hexyloxy)phenyl]ethynyl}(trimethyl)silane **11**.

| Entry <sup>a</sup> | Catalyst (mol%)                         | Reaction time | Conversion (%) |
|--------------------|-----------------------------------------|---------------|----------------|
| 1                  | TBAF <sup>b</sup> (100)                 | 20 h          | 90             |
| 2                  | TBAF · H <sub>2</sub> O (20)            | 15'           | 100            |
| 3                  | TBAF · H <sub>2</sub> O (10)            | 15'           | 100            |
| 4                  | TBAF · H <sub>2</sub> O (5)             | 15'           | 3              |
| 5                  | TBAF · H <sub>2</sub> O (5)             | 2 h           | 6              |
| 6                  | TBAF · H <sub>2</sub> O (5)             | 20 h          | 55             |
| 7                  | Amb-F (20)                              | 15'           | 5              |
| 8                  | Amb-F (20)                              | 3 h           | 36             |
| 9                  | Amb-F (20)                              | 20 h          | 84             |
| 10                 | Amb-F (20)                              | 48 h          | 100            |
| 11                 | TBAF/SiO <sub>2</sub> (20)              | 15'           | 100            |
| 12                 | TBAF/SiO <sub>2</sub> (10) <sup>c</sup> | 15'           | 45             |
| 13                 | TBAF/SiO <sub>2</sub> (10) <sup>c</sup> | 2 h           | 73             |
| 14                 | TBAF/SiO <sub>2</sub> (10) <sup>c</sup> | 3 h           | 100            |
| 15                 | TBAF/SiO <sub>2</sub> (10) <sup>d</sup> | 20 h          | 5              |
| 16                 | KF/Al <sub>2</sub> O <sub>3</sub> (10)  | 20 h          | --             |
| 17                 | DABCO-F2 (10) <sup>e</sup>              | 20 h          | 21             |

<sup>a</sup> SolFC; <sup>b</sup> 1M in THF; <sup>c</sup> loading: 1.25 mmol/g; <sup>d</sup> loading: 0.29 mmol/g; <sup>e</sup> loading: 4.8 mmol/g

**Table S7.** Optical band gaps for compounds **1-4** in solution (CHCl<sub>3</sub>) and as thin-films.

| <b>Donor</b> | $(E_g^{opt})_{soln}$<br>(eV) | $(E_g^{opt})_{film}$<br>(eV) |
|--------------|------------------------------|------------------------------|
| <b>1</b>     | 2.49                         | 2.98                         |
| <b>2</b>     | 2.45                         | 2.22                         |
| <b>3</b>     | 2.36                         | 2.36                         |
| <b>4</b>     | 2.38                         | 2.49                         |

**Table S8.** FET performance parameters measured under vacuum for anthracene-based arylacetylenes **1**, **3**, and **4** films spin-cast from chloroform.

| Semiconductor | T <sub>a</sub> <sup>a</sup> (°C) | μ <sup>b</sup> (cm <sup>2</sup> V <sup>-1</sup> s <sup>-1</sup> ) | I <sub>on</sub> /I <sub>off</sub> | V <sub>t</sub> (V) |
|---------------|----------------------------------|-------------------------------------------------------------------|-----------------------------------|--------------------|
| <b>1</b>      | -                                | 4.3x10 <sup>-5</sup>                                              | 1.2x10 <sup>4</sup>               | -59                |
|               | 40                               | 4.0x10 <sup>-5</sup>                                              | 2.3x10 <sup>4</sup>               | -32                |
|               | 60                               | 3.2x10 <sup>-5</sup>                                              | 2.7x10 <sup>4</sup>               | -35                |
|               | 80                               | no activity                                                       | -                                 | -                  |
|               | 120                              | no activity                                                       | -                                 | -                  |
| <b>3</b>      | -                                | 5.5x10 <sup>-5</sup>                                              | 7.7x10 <sup>1</sup>               | -70                |
|               | 40                               | 2.0x10 <sup>-6</sup>                                              | 3.2x10 <sup>1</sup>               | -40                |
|               | 60                               | 4.7x10 <sup>-6</sup>                                              | 2.7x10 <sup>1</sup>               | -74                |
|               | 80                               | no activity                                                       | -                                 | -                  |
|               | 120                              | no activity                                                       | -                                 | -                  |
| <b>4</b>      | -                                | 4.0x10 <sup>-4</sup>                                              | 4.9x10 <sup>2</sup>               | 5                  |
|               | 40                               | 3.2x10 <sup>-4</sup>                                              | 1.2x10 <sup>3</sup>               | -1                 |
|               | 60                               | 4.9x10 <sup>-3</sup>                                              | 1.5x10 <sup>3</sup>               | -8                 |
|               | 80 <sup>b</sup>                  | 3.4x10 <sup>-2</sup>                                              | 1.0x10 <sup>5</sup>               | -4                 |
|               | 120                              | no activity                                                       | -                                 | -                  |

<sup>a</sup>T<sub>a</sub>= annealing temperature. <sup>b</sup>Annealing time: 2h

**Table S9.** Summary of diffraction-derived d-spacing (d), computed molecular lengths (l), and calculated molecular long axis tilt angles ( $\varphi$ ) in semiconducting film of compounds **1-4** spin-coated from chloroform solution.

| Semiconductor | d-spacing<br>(d, Å) <sup>a</sup> | Molecular length<br>(l, Å) <sup>b</sup> | Tilt angle<br>( $\varphi$ , deg) <sup>c</sup> |
|---------------|----------------------------------|-----------------------------------------|-----------------------------------------------|
| <b>1</b>      | 26.8                             | 33.3                                    | 36.4                                          |
| <b>2</b>      | 27.6                             | 33.3                                    | 34.0                                          |
| <b>3</b>      | 18.9                             | 27.6                                    | 46.8                                          |
| <b>4</b>      | 39.9                             | 27.6                                    | -                                             |

<sup>a</sup>Minority phases are not reported; <sup>b</sup>Semiempirical AM1 calculations; <sup>c</sup>With respect to substrate normal.  
 $\varphi = \cos^{-1}(d/l)$

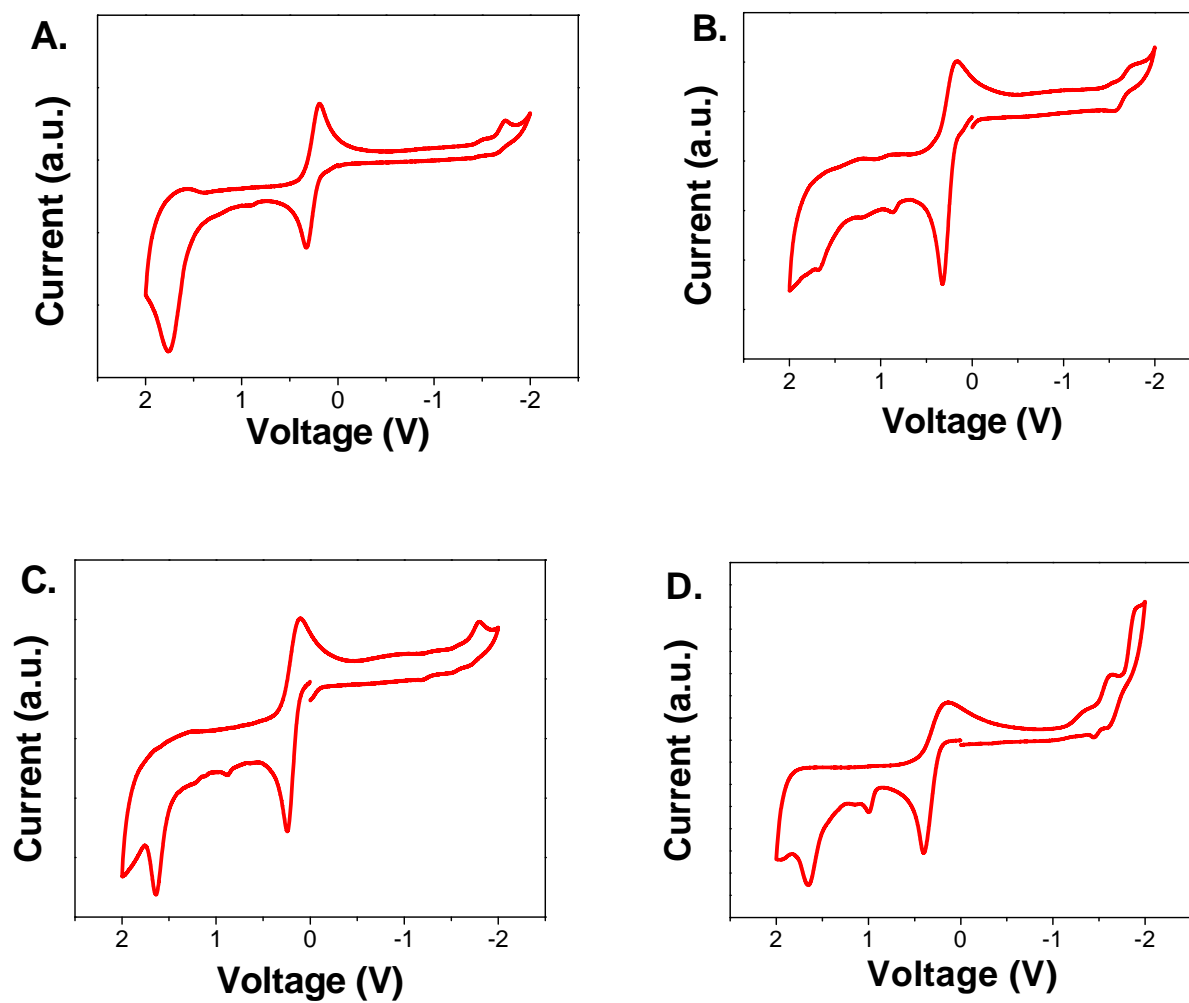

**Figure S1.** CV curves of anthracene derivatives **1-4** in 0.1 M  $\text{Bu}_4\text{N}^+\text{PF}_6^-$  solution in  $\text{CH}_2\text{Cl}_2$  at a scan rate of 100 mV/s. Ferrocene was used as internal standard.



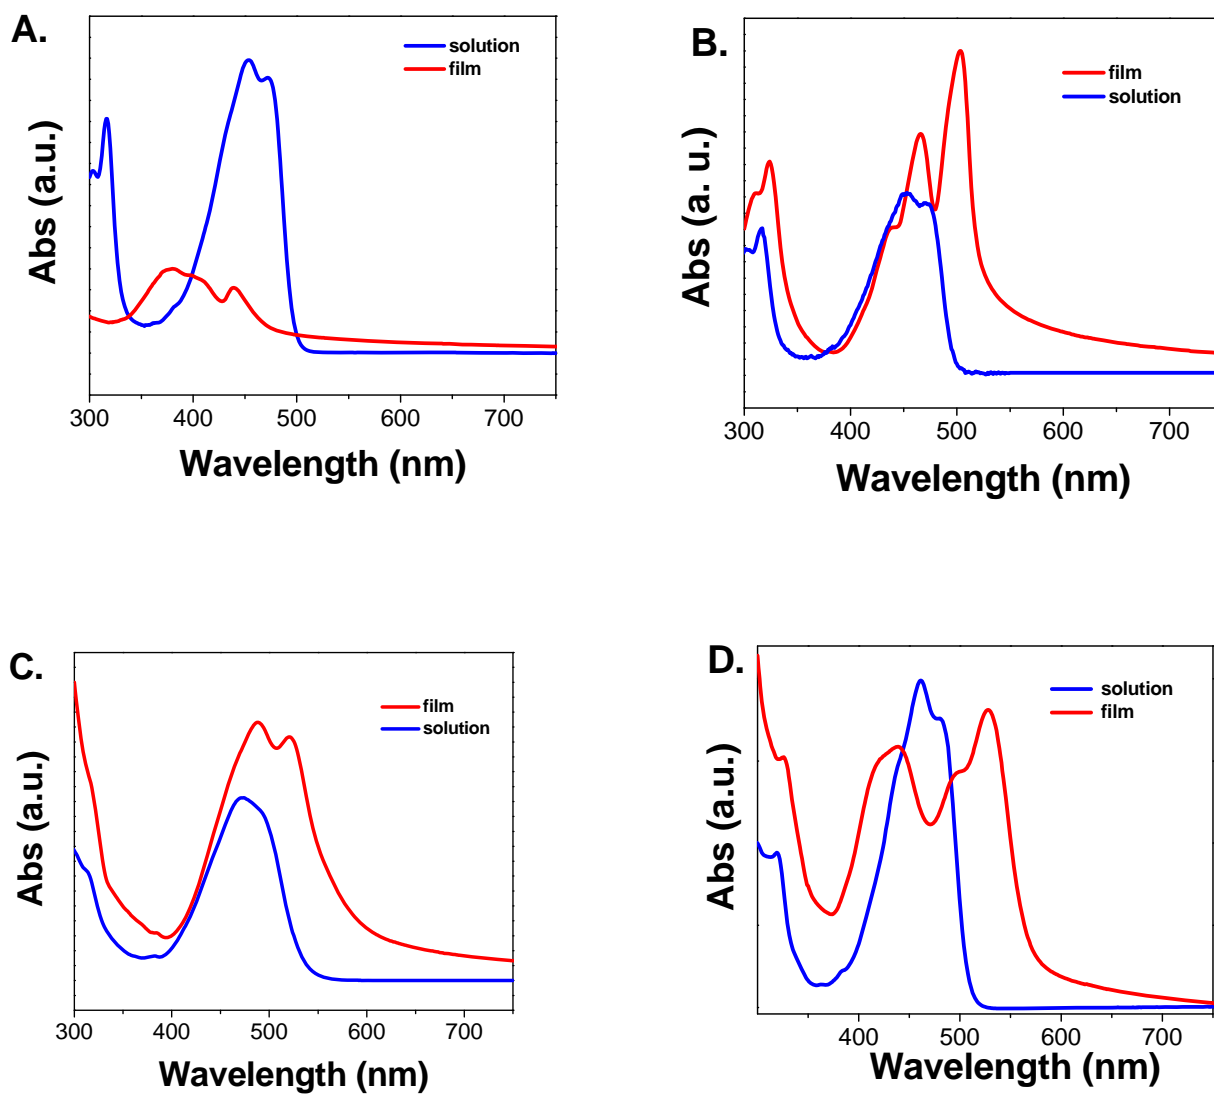

**Figure S2.** Optical absorption spectra for pristine semiconductors **1-4** in solution and as thin films on glass substrates.

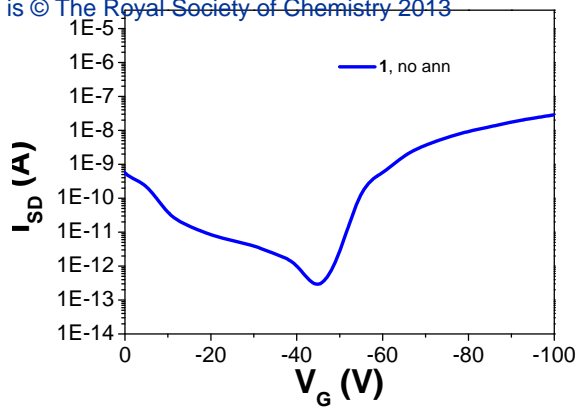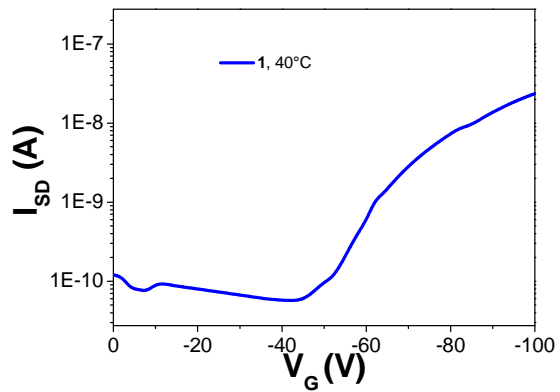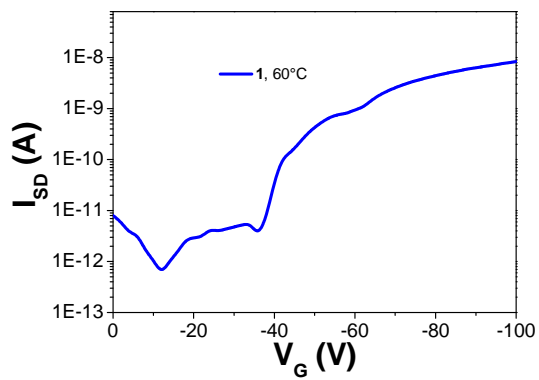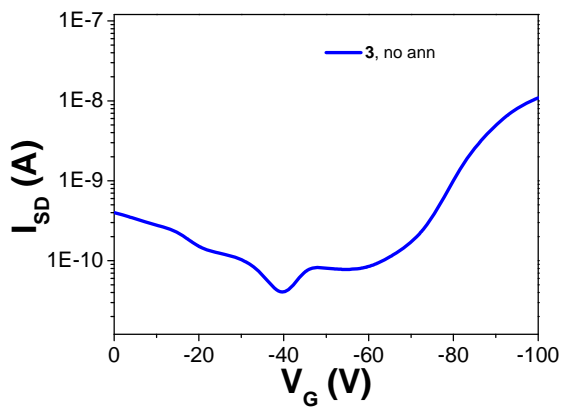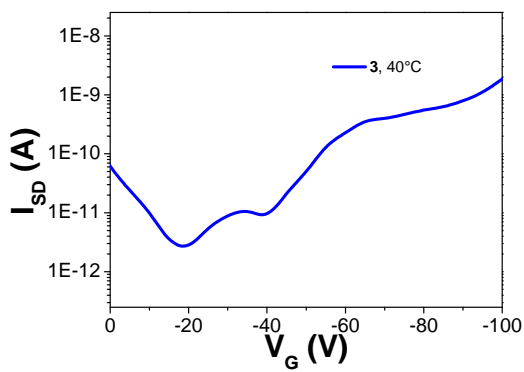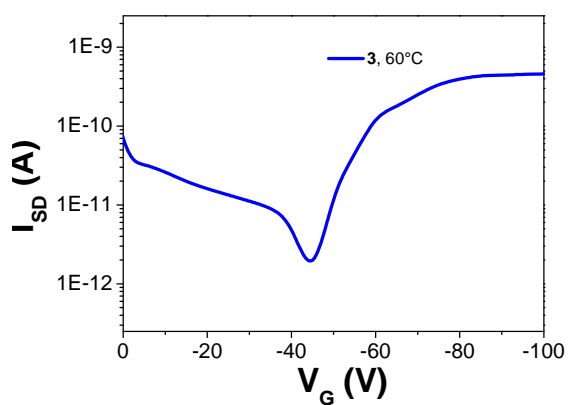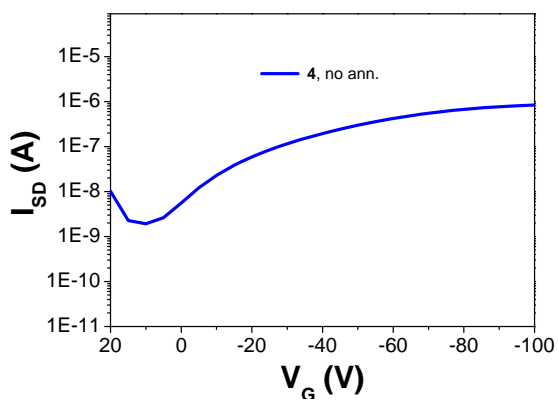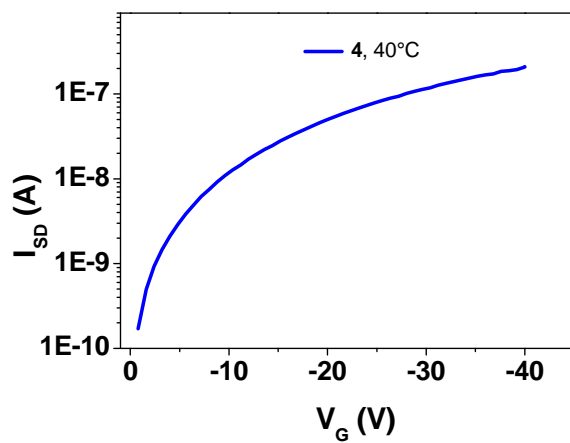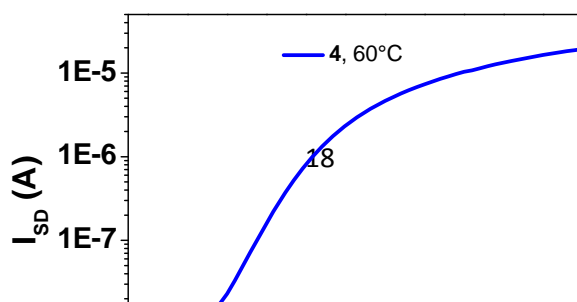

**Figure S3.** FET transfer plots of arylacetylenes **1**, **3**, and **4** spin cast from chloroform onto Si/SiO<sub>2</sub> substrates and annealed at the indicated temperatures. Devices measured in vacuum.

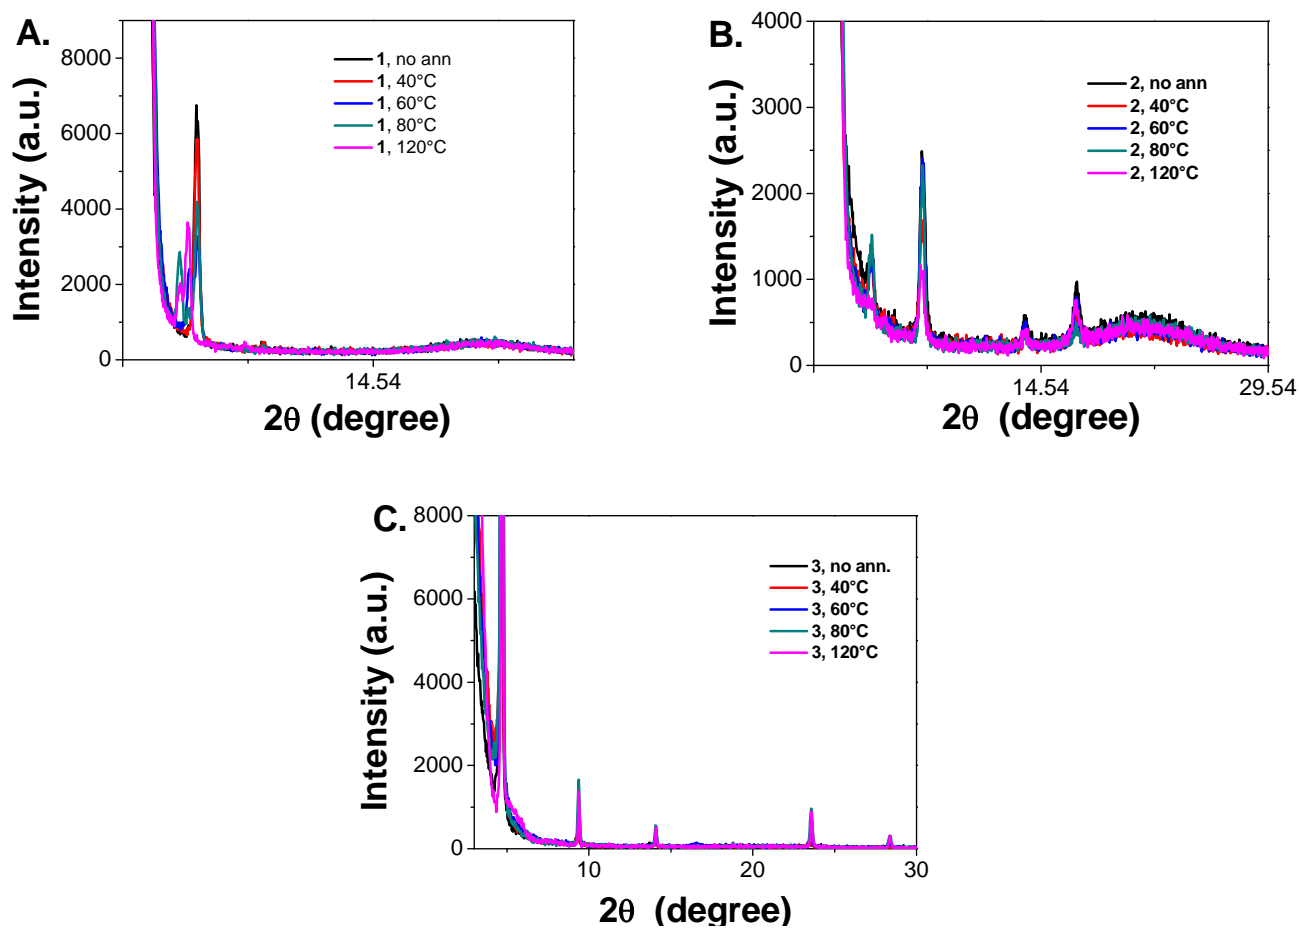

**Figure S4.**  $\theta$  - $2\theta$  X-ray diffraction data for spin-cast films of the semiconductors **1-3** annealed at the indicated temperatures and spin-cast from chloroform on Si/SiO<sub>2</sub> substrates.

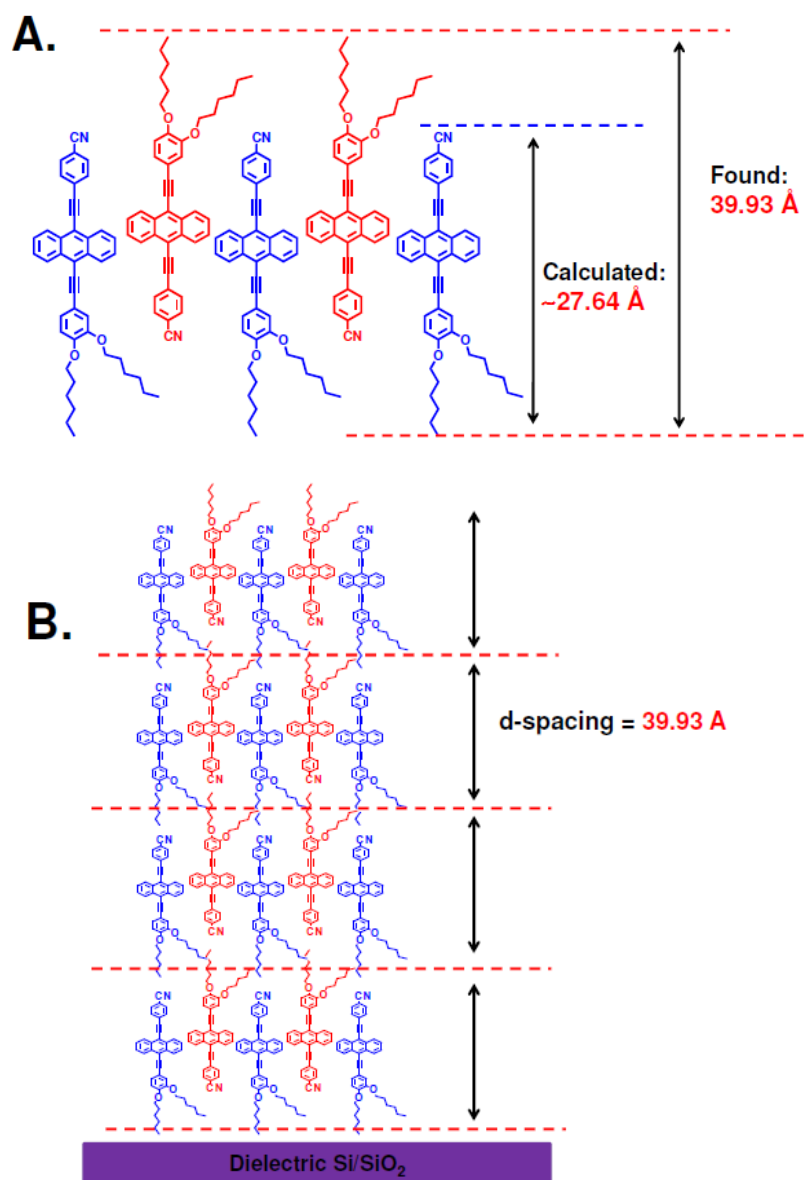

Figure

S5.

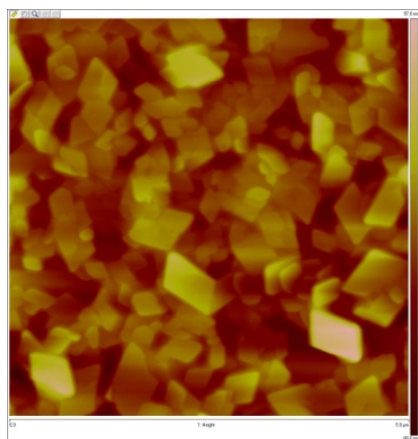

(A.)

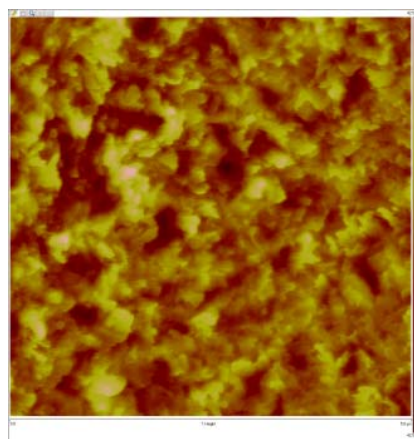

(B.)

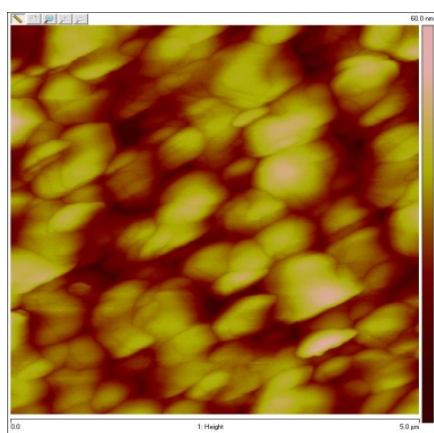

(C.)

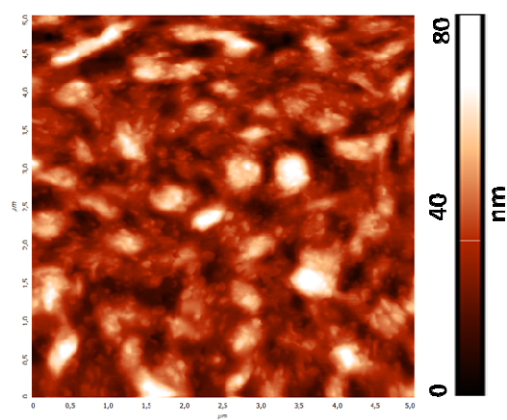

(D.)

**Figure S6.** Tapping mode AFM images ( $5 \times 5 \mu\text{m}$ ) of films of (A.) **1**, (B.) **2**, (C.) **3**, and (D.) **4** spin-cast from chloroform on Si/SiO<sub>2</sub> substrates.

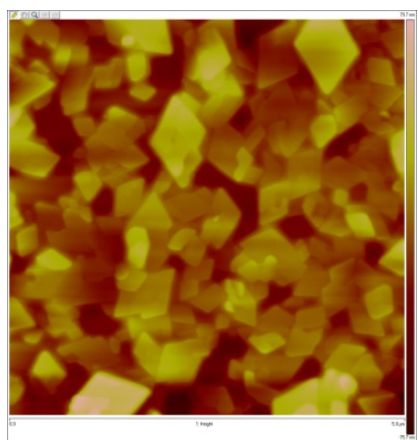

(A.)

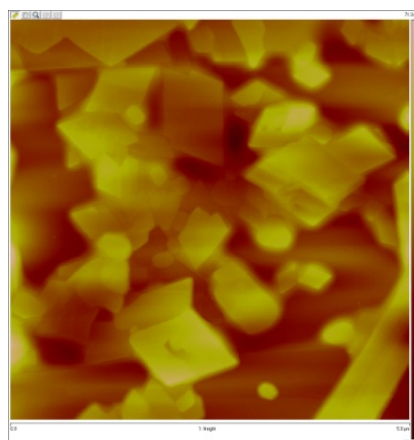

(B.)

**Figure S7.** Tapping mode AFM images ( $5 \times 5 \mu\text{m}$ ) of films of **1** spin-cast from chloroform on Si/SiO<sub>2</sub>

substrates annealed at (A.) 40°C, (B.) 60°C

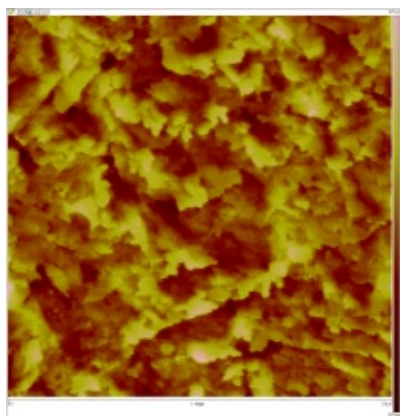

(A.)

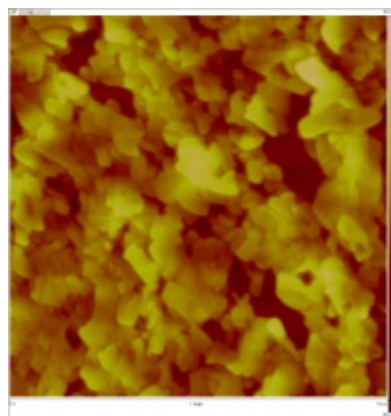

(B.)

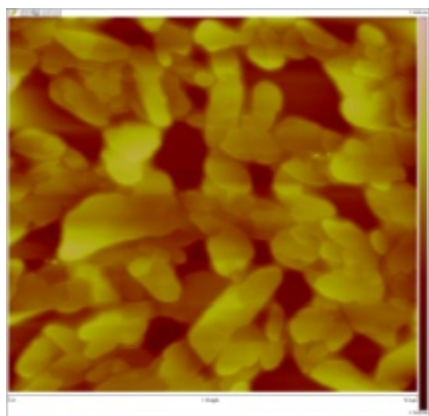

(C.)

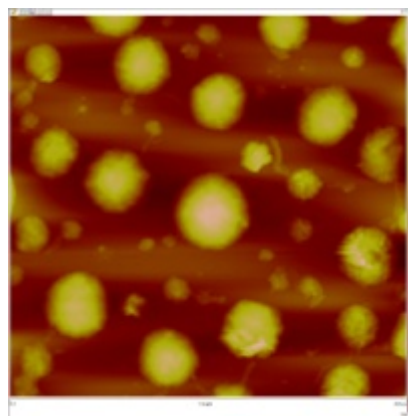

(D.)

**Figure S8.** Tapping mode AFM images ( $5 \times 5 \mu\text{m}$ ) of films of **2** spin-cast from chloroform on Si/SiO<sub>2</sub> substrates annealed at (A.) 40°C, (B.) 60°C, (C.) 80°C, and (D.) 120°C

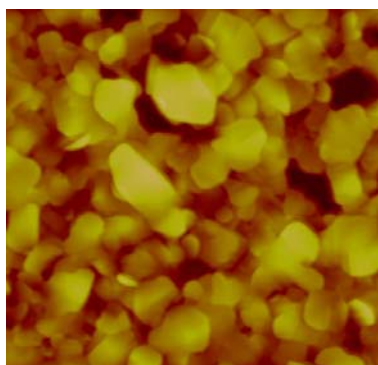

(A.)

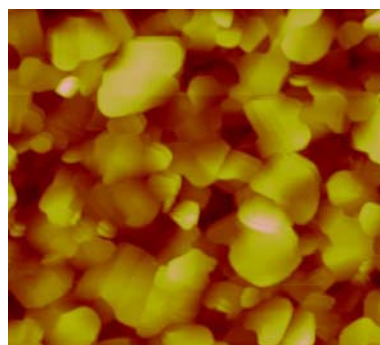

(B.)

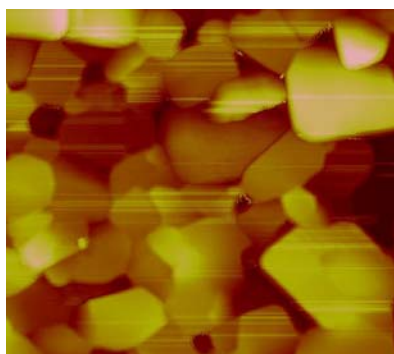

(C.)

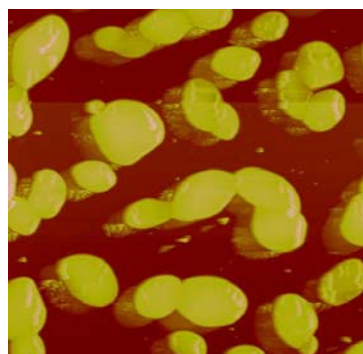

(D.)

**Figure S9.** Tapping mode AFM images ( $5 \times 5 \mu\text{m}$ ) of films of **3** spin-cast from chloroform on Si/SiO<sub>2</sub> substrates annealed at (A.) 40°C, (B.) 60°C, (C.) 80°C, and (D.) 120°C



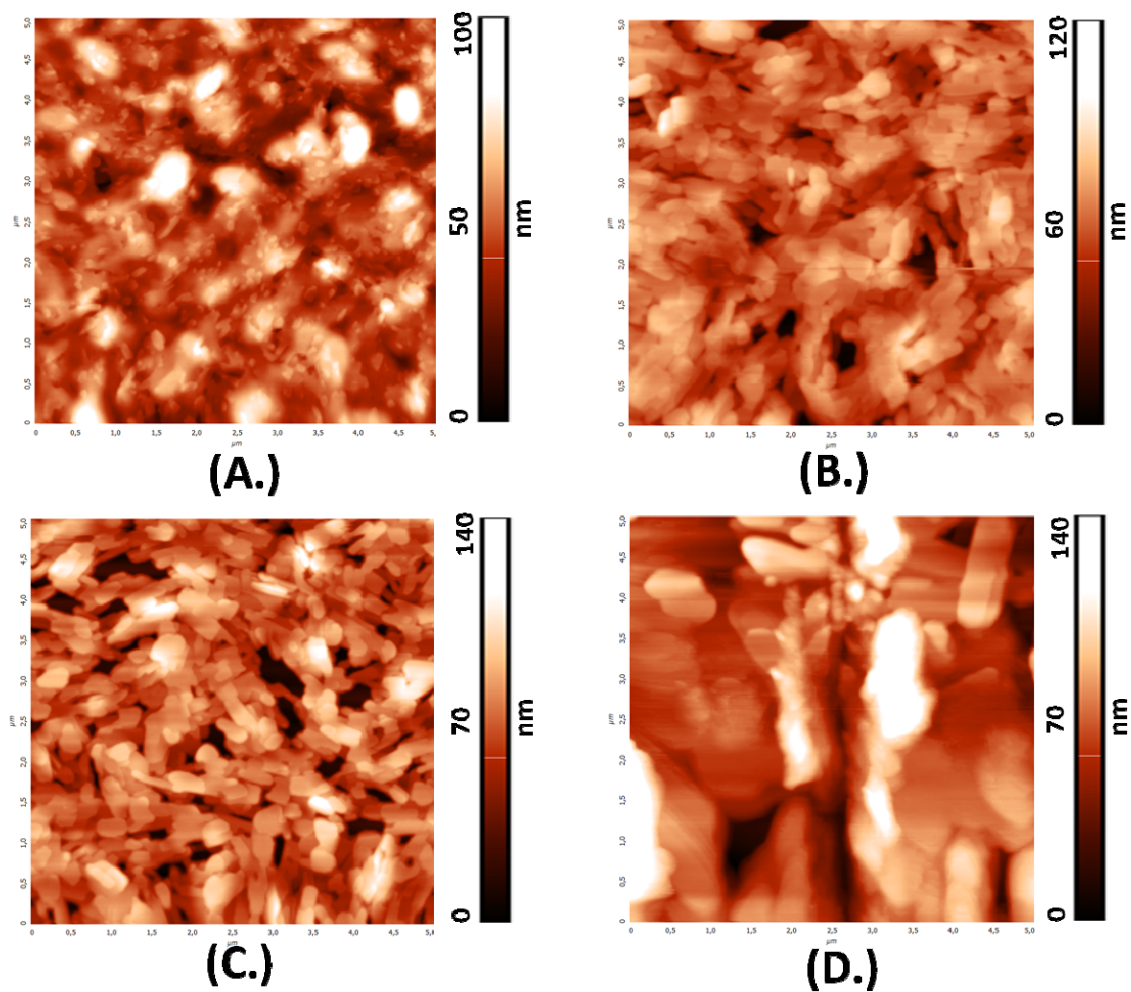

**Figure S10.** Tapping mode AFM images (5×5 μm) of films of 4 spin-cast from chloroform on Si/SiO<sub>2</sub> substrates annealed at (A.) 40°C, (B.) 60°C, (C.) 80°C, and (D.) 120°C

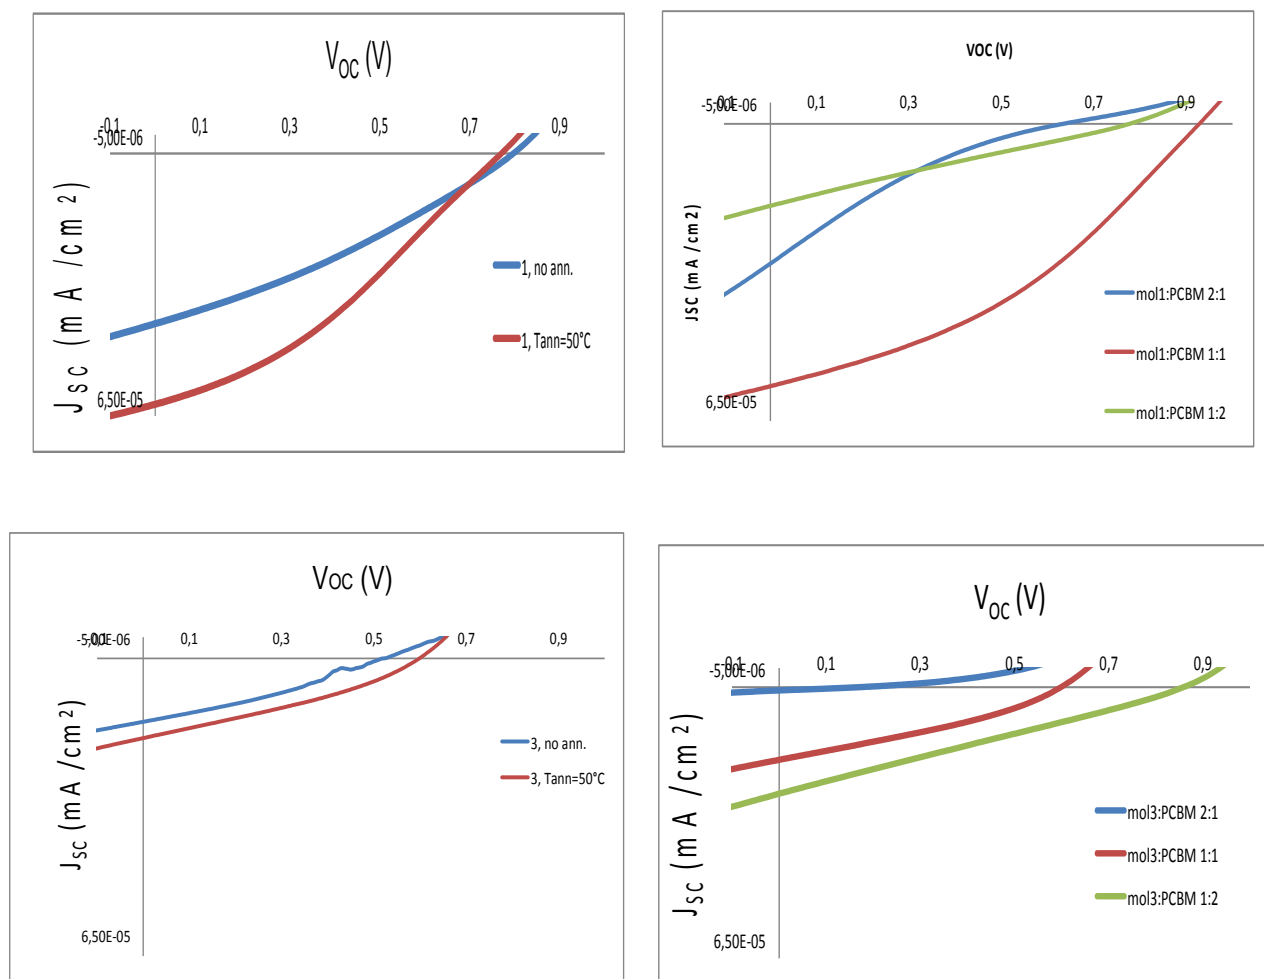

**Figure S11.** Current density (J)-Voltage (V) characteristics under illumination of optimized 1-, 3- /PCBM based BHJ devices.

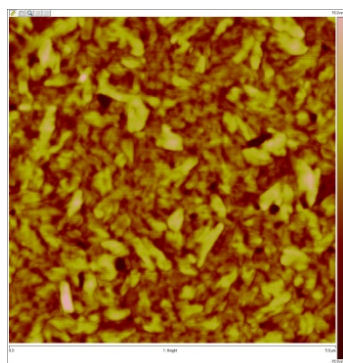

(A)

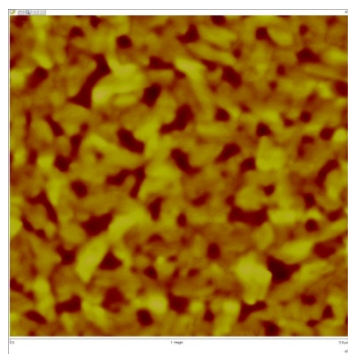

(B)

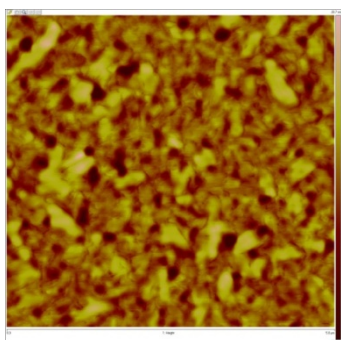

(C)

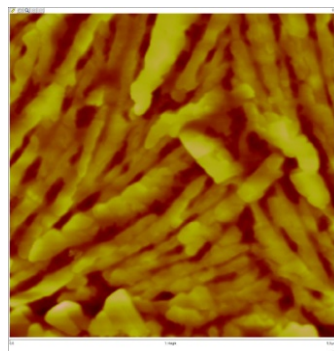

(D)

**Figure S12.** Tapping mode AFM images ( $5 \times 5 \mu\text{m}$ ) of spin-coated films. A.) **1/PCBM 2:1**; B.) **1/PCBM 1:1**; C.) **1/PCBM 1:1** annealed at  $50^\circ\text{C}$ ; D.) **3/PCBM 2:1**

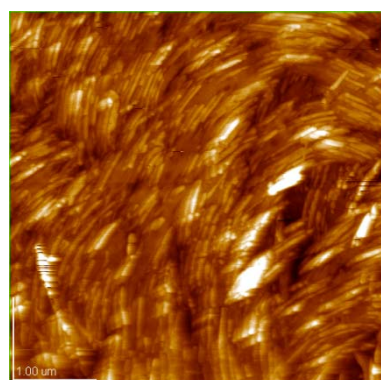

4/PCBM 1:2  $T_a = 50^\circ\text{C}$

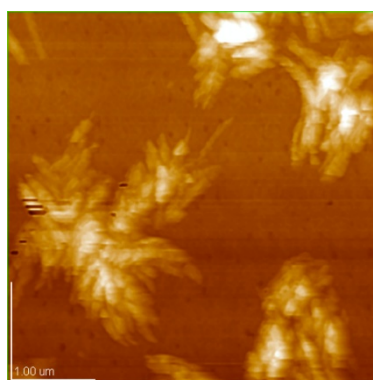

4/PCBM 1:1 no annealing

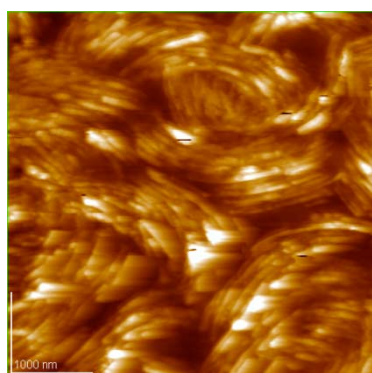

4/PCBM 1:1  $T_a = 50^\circ\text{C}$

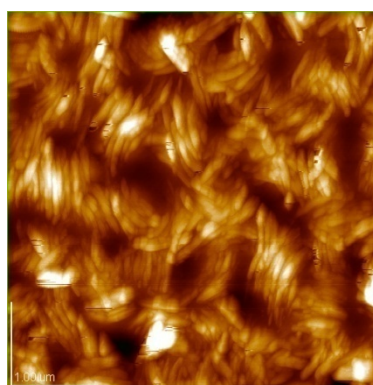

4/PCBM 2:1 no annealing

**Figure S13.** Tapping mode AFM images ( $1\mu\text{m}\times 1\mu\text{m}$ ) of spin-coated 4/PCBM films as a function of D/A ratio, at the indicated annealing temperatures.

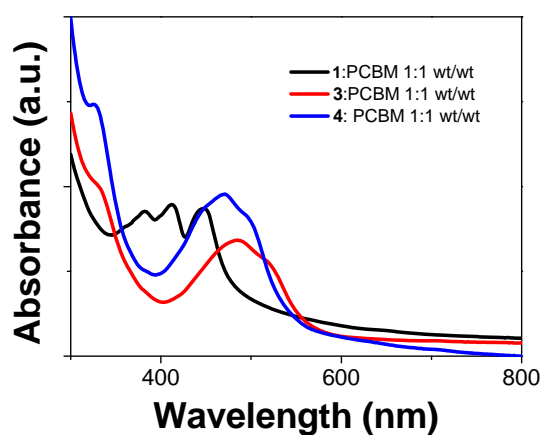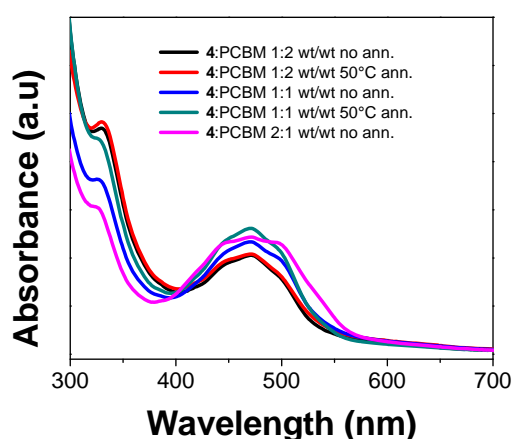

**Figure S14.** Absorption spectra for 1/PCBM, 3/PCBM and 4/PCBM blend films.

## References

- S1. L. Valentini, D. Bagnis, A. Marrocchi, M. Seri, A. Taticchi, and J. M. Kenny *Chem. Mater.* 2008, **20**, 32
- S2. A. Marrocchi, A. Spalletti, R. Flamini, I., S. Ciorba, M. Seri, F. Elisei, and A. Taticchi, *J. Photochem. Photobiol. A* 2010, **211**, 162
- S3. R. Flamini, I. Tomasi, A. Marrocchi, B. Carlotti, A. Spalletti, *J. Photochem. Photobiol. A* 2011, **223**, 140
